# Supplementary material for: A Randomised-Controlled Trial of Vitamin D and Omega-3 Long Chain Polyunsaturated Fatty Acids in the Treatment of Core Symptoms of Autism Spectrum Disorder in Children
Source: Springer Nature journal article supplement (doi:10.1007/s10803-018-3860-y), 2019-01-03
Supplement: MOESM4 [file 16374478]

| **Supplemental Table 4:** Gastrointestinal symptoms and other adverse events reported over the study period across treatment groups (n=73) | | | | | |
| --- | --- | --- | --- | --- | --- |
| **Adverse events reported by parents/caregivers** | **Treatment groups** | | | | **Total** |
| **VID** | **OM** | **VIDOM** | **Placebo** |
| **Gastrointestinal symptoms 1** | | | | | |
| Diarrhoea | 2 | 4 | 3 | 1 | 10 |
| Constipation | 0 | 3 | 1 | 4 | 8 |
| Nausea/vomiting | 1 | 0 | 0 | 0 | 1 |
| Abdominal pain | 6 | 2 | 2 | 3 | 13 |
| Excessive wind | 2 | 1 | 3 | 0 | 6 |
| Bloating | 1 | 0 | 0 | 0 | 1 |
| **Other adverse events** | | | | | |
| Allergic reaction | 0 | 5 | 1 | 0 | 6 |
| Headache | 0 | 2 | 1 | 0 | 3 |
| Increased urination/bedwetting | 1 | 3 | 1 | 2 | 7 |
| Hyperactivity | 1 | 1 | 1 | 1 | 4 |
| Nail problems 2 | 0 | 1 | 1 | 0 | 2 |
| Nose-bleeding 3 | 13 | 1 | 0 | 0 | 2 |
| VID, Vitamin D; OM, Omega-3; VIDOM, Vitamin D+omega-3  1 Number of children reported here if their parents reported a gastrointestinal symptom for more than four weeks, though at irregular intervals.  2 Nail problems included white lines on nail, nail picking  3 The child had nose-bleeding for two weeks toward the end of study. | | | | | |
